# Supplementary material for: Association between MTTP genotype (-493G/T) polymorphism and hepatic steatosis in hepatitis C: a systematic review and meta-analysis
Source: Springer Nature journal article supplement (doi:10.1186/s12944-023-01916-x), 2023-09-19
Supplement: MOESM1 [file 12944_2023_1916_MOESM1_ESM.pdf]

## **Language Editing Certification**

To whom it may concern:

The manuscript, entitled “MTTP genotype (-493G/T) polymorphism and susceptibility to hepatic steatosis in hepatitis C: a meta-analysis”, has been professionally edited for English usage, grammar, spelling, and punctuation by a native English speaker and a skilled professional editor. Therefore, we would appreciate if any comments regarding language are as specific as possible.



Genesis Technology Communication (Beijing), Co., Ltd.

2023.5.22
